# Supplementary material for: Genome‐wide decrease in DNA methylation in adults with epilepsy treated with modified ketogenic diet: A prospective study
Source: PubMed Central journal article supplement — Epilepsia. 2022 Jul 10;63(9):2413–26. doi: 10.1111/epi.17351 (PMC9796519; doi:10.1111/epi.17351), 2022-07-10
Supplement: EPI-63-2413-s001.pdf [file EPI-63-2413-s001.pdf]

## Epilepsia

### Supporting Information

#### **Genome-wide decrease in DNA methylation in adults with epilepsy treated with modified ketogenic diet: A prospective study.**

Sigrid Pedersen<sup>1</sup>, Magnhild Kverneland<sup>1</sup>, Karl Otto Nakken<sup>1</sup>, Knut Rudi<sup>2</sup>, Per Ole Iversen<sup>3,4</sup>, Kristina Gervin<sup>5</sup>, Kaja Kristine Selmer<sup>1,5</sup>

#### **Affiliations**

<sup>1</sup>National Centre for Epilepsy, Oslo University Hospital, P.O. Box 4950, Nydalen, 0424 Oslo, Norway

<sup>2</sup>Department of Chemistry, Biotechnology & Food Science, Norwegian University of Life Sciences, P.O. Box 5003 NMBU, 1432 Ås, Norway

<sup>3</sup>Department of Nutrition, University of Oslo, P.O. Box 1046, Blindern, 0317 Oslo, Norway

<sup>4</sup>Department of Hematology, Oslo University Hospital, P.O. Box 4950 Nydalen, 0424 Oslo, Norway

<sup>5</sup>Department of Research and Innovation, Oslo University Hospital, P.O. Box 4950 Nydalen, 0424 Oslo, Norway

#### **Correspondence**

Sigrid Pedersen: [sigrpe@ous-hf.no](mailto:sigrpe@ous-hf.no)

**Table S1** Mean percentage change in seizure frequency after 12 weeks of dietary treatment (n = 49)

| Mean percentage change in seizure frequency* | Number of patients (%) |
|----------------------------------------------|------------------------|
| Seizure freedom                              | 0 (0%)                 |
| 90 – 99.9% seizure reduction                 | 1 (2.0%)               |
| 50 – 89.9% seizure reduction                 | 8 (16.3%)              |
| 25 – 49.9% seizure reduction                 | 11 (22.4%)             |
| <25% seizure reduction                       | 29 (59.2%)             |

\*Mean percentage change in seizure frequency is calculated comparing the seizure frequency in week 5-12 of the intervention period to the seizure frequency in week 1-12 of the baseline period.

**Table S2** Differentially methylated CpGs (sorted alphabetically by gene name and ascending by cgID for CpGs with no gene annotation) across all time points (n = 47)

| cgID       | Gene       | Full gene name                                              | Chr | Position  | Gene context      | CpG context | Mean beta |       |       | Δ beta |        |        | P-value | FDR   |
|------------|------------|-------------------------------------------------------------|-----|-----------|-------------------|-------------|-----------|-------|-------|--------|--------|--------|---------|-------|
|            |            |                                                             |     |           |                   |             | B         | 4W    | 12W   | 4W-B   | 12W-B  | 12W-4W |         |       |
| cg17828988 | ANXA11     | Annexin A11                                                 | 10  | 81951504  | 5'UTR             | OpenSea     | 0.725     | 0.699 | 0.696 | -0.026 | -0.029 | -0.003 | 4.0E-06 | 0.038 |
| cg14237301 | APOB48R    | Apolipoprotein B48 receptor                                 | 16  | 28506477  | Body              | N_Shelf     | 0.675     | 0.647 | 0.652 | -0.028 | -0.023 | 0.005  | 5.6E-06 | 0.043 |
| cg18019618 | ARHGEF28   | Rho guanine nucleotide exchange factor 28                   | 5   | 72964090  | 5'UTR             | OpenSea     | 0.600     | 0.573 | 0.570 | -0.027 | -0.030 | -0.003 | 2.7E-06 | 0.032 |
| cg07380641 | B4GALT5    | Beta-1.4-galactosyltransferase 5                            | 20  | 48295033  | Body              | OpenSea     | 0.509     | 0.477 | 0.478 | -0.032 | -0.031 | 0.001  | 1.2E-06 | 0.023 |
| cg10077346 | BCKDHB     | Branched chain keto acid dehydrogenase E1 subunit beta      | 6   | 80920458  | Body              | OpenSea     | 0.748     | 0.716 | 0.728 | -0.032 | -0.020 | 0.012  | 2.1E-06 | 0.029 |
| cg07397033 | BLNK       | B cell linker                                               | 10  | 98031201  | 5'UTR;<br>1stExon | OpenSea     | 0.573     | 0.555 | 0.547 | -0.019 | -0.027 | -0.008 | 3.5E-06 | 0.035 |
| cg04871807 | C5orf27    | NA                                                          | 5   | 95186505  | TSS1500           | OpenSea     | 0.536     | 0.508 | 0.506 | -0.028 | -0.030 | -0.002 | 3.3E-08 | 0.003 |
| cg14928764 | CD93       | CD93 molecule                                               | 20  | 23064608  | Body              | OpenSea     | 0.821     | 0.799 | 0.796 | -0.023 | -0.026 | -0.003 | 1.1E-07 | 0.004 |
| cg20601482 | CERS6      | Ceramide synthase 6                                         | 2   | 169337576 | Body              | OpenSea     | 0.737     | 0.711 | 0.714 | -0.026 | -0.023 | 0.003  | 8.7E-07 | 0.019 |
| cg08077617 | CES1       | Carboxylesterase 1                                          | 16  | 55868196  | TSS1500           | S_Shore     | 0.639     | 0.602 | 0.605 | -0.037 | -0.034 | 0.003  | 1.3E-06 | 0.024 |
| cg02554361 | CIITA      | Class II major histocompatibility complex transactivator    | 16  | 11001757  | Body              | Island      | 0.912     | 0.902 | 0.902 | -0.010 | -0.009 | 0.001  | 4.5E-06 | 0.040 |
| cg04075184 | CLASP1     | Cytoplasmic linker associated protein 1                     | 2   | 122290763 | Body              | S_Shelf     | 0.744     | 0.732 | 0.718 | -0.012 | -0.025 | -0.014 | 1.4E-06 | 0.025 |
| cg08813944 | CPSF4L     | Cleavage and polyadenylation specific factor 4 like         | 17  | 71258589  | TSS1500           | OpenSea     | 0.746     | 0.721 | 0.715 | -0.025 | -0.031 | -0.006 | 2.8E-06 | 0.033 |
| cg19393755 | CPSF4L     | Cleavage and polyadenylation specific factor 4 like         | 17  | 71258101  | TSS200            | OpenSea     | 0.707     | 0.689 | 0.680 | -0.018 | -0.027 | -0.009 | 4.4E-06 | 0.040 |
| cg22911054 | CPT1A      | Carnitine palmitoyltransferase 1A                           | 11  | 68603379  | 5'UTR             | N_Shelf     | 0.770     | 0.745 | 0.728 | -0.025 | -0.042 | -0.017 | 2.0E-10 | 0.000 |
| cg11095122 | CSGALNACT1 | Chondroitin sulfate N-acetylgalactosaminyltransferase 1     | 8   | 19540734  | TSS1500           | OpenSea     | 0.673     | 0.642 | 0.653 | -0.031 | -0.019 | 0.012  | 3.8E-06 | 0.037 |
| cg06070496 | DLGAP1     | DLG associated protein 1                                    | 18  | 3706638   | Body              | OpenSea     | 0.634     | 0.610 | 0.601 | -0.024 | -0.033 | -0.009 | 1.9E-06 | 0.028 |
| cg12359298 | DTD1       | D-tyrosyl-tRNA deacylase 1                                  | 20  | 18735103  | 3'UTR             | OpenSea     | 0.683     | 0.656 | 0.653 | -0.026 | -0.029 | -0.003 | 4.0E-07 | 0.012 |
| cg15546194 | DZIP1L     | DAZ interacting zinc finger protein 1 like                  | 3   | 137800724 | Body              | OpenSea     | 0.685     | 0.664 | 0.666 | -0.021 | -0.018 | 0.002  | 3.0E-06 | 0.034 |
| cg07019857 | EFNA5      | Ephrin A5                                                   | 5   | 106822849 | Body              | OpenSea     | 0.707     | 0.715 | 0.679 | 0.008  | -0.028 | -0.037 | 1.7E-06 | 0.028 |
| cg18518074 | EHD1       | EH domain containing 1                                      | 11  | 64642316  | Body              | N_Shelf     | 0.495     | 0.464 | 0.467 | -0.031 | -0.027 | 0.003  | 1.0E-06 | 0.021 |
| cg03457142 | EIF4E3     | Eukaryotic translation initiation factor 4E family member 3 | 3   | 71804859  | TSS1500           | S_Shore     | 0.498     | 0.484 | 0.478 | -0.014 | -0.019 | -0.006 | 2.6E-06 | 0.032 |
| cg23752007 | ELMO1      | Engulfment and cell motility 1                              | 7   | 37429500  | 5'UTR             | OpenSea     | 0.742     | 0.717 | 0.720 | -0.025 | -0.022 | 0.003  | 1.9E-06 | 0.028 |
| cg02314596 | FOXN3      | Forkhead box N3                                             | 14  | 89852725  | Body              | OpenSea     | 0.744     | 0.720 | 0.727 | -0.024 | -0.017 | 0.007  | 1.8E-07 | 0.006 |
| cg02479755 | FTO        | Fat mass and obesity-associated protein                     | 16  | 54097517  | Body              | OpenSea     | 0.830     | 0.808 | 0.804 | -0.022 | -0.026 | -0.004 | 3.7E-07 | 0.011 |
| cg03702011 | GALNT2     | Polypeptide N-acetylgalactosaminyltransferase 2             | 1   | 230193513 | TSS200            | OpenSea     | 0.732     | 0.701 | 0.708 | -0.031 | -0.024 | 0.007  | 5.2E-07 | 0.015 |
| cg20703242 | GALNT2     | Polypeptide N-acetylgalactosaminyltransferase 2             | 1   | 230279135 | Body              | OpenSea     | 0.510     | 0.490 | 0.487 | -0.020 | -0.023 | -0.003 | 4.3E-06 | 0.040 |
| cg06783533 | GNAO1      | G protein subunit alpha o1                                  | 16  | 56388908  | Body              | OpenSea     | 0.843     | 0.822 | 0.820 | -0.021 | -0.023 | -0.002 | 4.9E-06 | 0.041 |
| cg27246571 | HAL        | Histidine ammonia-lyase                                     | 12  | 96389588  | Body              | Island      | 0.720     | 0.693 | 0.694 | -0.028 | -0.026 | 0.001  | 1.0E-06 | 0.021 |
| cg17439422 | HEPN1      | Hepatocellular carcinoma down-regulated 1                   | 11  | 124788656 | TSS1500           | N_Shelf     | 0.836     | 0.820 | 0.818 | -0.017 | -0.019 | -0.002 | 2.5E-08 | 0.002 |
| cg06865026 | IMPA2      | Inositol monophosphatase 2                                  | 18  | 12015910  | Body              | OpenSea     | 0.850     | 0.820 | 0.831 | -0.029 | -0.019 | 0.010  | 1.1E-08 | 0.002 |

Table S2 (continued)

| cgID       | Gene          | Full gene name                                                      | Chr | Position  | Gene context     | CpG context | Mean beta |       |       | Δ beta |        |        | P-value | FDR   |
|------------|---------------|---------------------------------------------------------------------|-----|-----------|------------------|-------------|-----------|-------|-------|--------|--------|--------|---------|-------|
|            |               |                                                                     |     |           |                  |             | B         | 4W    | 12W   | 4W-B   | 12W-B  | 12W-4W |         |       |
| cg00416922 | INPP1         | Inositol polyphosphate-1-phosphatase                                | 2   | 191207560 | TSS1500          | N_Shore     | 0.712     | 0.691 | 0.691 | -0.021 | -0.021 | 0.000  | 1.8E-06 | 0.028 |
| cg11555067 | INPP4A        | Inositol polyphosphate-4-phosphatase type I A                       | 2   | 99081350  | 5'UTR            | OpenSea     | 0.291     | 0.262 | 0.275 | -0.029 | -0.017 | 0.013  | 2.1E-06 | 0.029 |
| cg10967866 | INPP5A        | Inositol polyphosphate-5-phosphatase A                              | 10  | 134362164 | Body             | S_Shore     | 0.744     | 0.712 | 0.716 | -0.032 | -0.028 | 0.004  | 8.3E-08 | 0.004 |
| cg19137806 | INPP5A        | Inositol polyphosphate-5-phosphatase A                              | 10  | 134362170 | Body             | S_Shore     | 0.709     | 0.677 | 0.678 | -0.031 | -0.030 | 0.001  | 4.5E-08 | 0.003 |
| cg05993525 | KCNQ1         | Potassium voltage-gated channel subfamily Q member 1                | 11  | 2769184   | Body             | OpenSea     | 0.567     | 0.534 | 0.539 | -0.033 | -0.027 | 0.005  | 1.0E-06 | 0.021 |
| cg08376310 | KCNQ1         | Potassium voltage-gated channel subfamily Q member 1                | 11  | 2858621   | Body             | OpenSea     | 0.902     | 0.887 | 0.886 | -0.016 | -0.016 | 0.000  | 5.4E-09 | 0.001 |
| cg21214508 | KIAA1267      | KAT8 regulatory NSL complex subunit 1                               | 17  | 44248233  | 1stExon          | OpenSea     | 0.865     | 0.849 | 0.851 | -0.017 | -0.015 | 0.002  | 2.1E-06 | 0.029 |
| cg04460609 | LDB2          | LIM domain binding 2                                                | 4   | 16532808  | Body             | OpenSea     | 0.514     | 0.490 | 0.481 | -0.024 | -0.033 | -0.009 | 4.1E-08 | 0.003 |
| cg24133663 | LEPREL1       | Prolyl 3-hydroxylase 2                                              | 3   | 189679585 | Body             | OpenSea     | 0.088     | 0.088 | 0.075 | -0.001 | -0.013 | -0.012 | 6.3E-07 | 0.016 |
| cg09954473 | LOC101927156  | NA                                                                  | 2   | 182245509 | Body             | OpenSea     | 0.826     | 0.805 | 0.810 | -0.021 | -0.017 | 0.005  | 4.7E-06 | 0.040 |
| cg01164919 | LOC101927588  | NA                                                                  | 8   | 125214930 | Body             | OpenSea     | 0.855     | 0.847 | 0.833 | -0.008 | -0.022 | -0.014 | 2.6E-06 | 0.032 |
| cg04232816 | LOC285033     | NA                                                                  | 2   | 96905390  | TSS1500          | OpenSea     | 0.703     | 0.682 | 0.674 | -0.022 | -0.029 | -0.008 | 6.4E-06 | 0.049 |
| cg18394235 | LTBP1         | Latent transforming growth factor beta binding protein 1            | 2   | 33359059  | TSS1500;<br>Body | OpenSea     | 0.686     | 0.663 | 0.659 | -0.023 | -0.027 | -0.004 | 5.3E-06 | 0.042 |
| cg06022811 | LY86;LY86-AS1 | Lymphocyte antigen 86;NA                                            | 6   | 6599919   | Body             | OpenSea     | 0.725     | 0.698 | 0.697 | -0.027 | -0.028 | -0.001 | 4.7E-06 | 0.040 |
| cg09427959 | MED13L        | Mediator complex subunit 13 like                                    | 12  | 116520303 | Body             | OpenSea     | 0.813     | 0.800 | 0.791 | -0.013 | -0.023 | -0.010 | 3.6E-06 | 0.036 |
| cg14728609 | MIR3134;SUSD1 | NA; Sushi domain containing 1                                       | 9   | 114933506 | Body             | N_Shelf     | 0.679     | 0.659 | 0.656 | -0.020 | -0.023 | -0.003 | 1.3E-06 | 0.024 |
| cg13617154 | NAT8          | N-acetyltransferase 8                                               | 2   | 73868507  | Body             | OpenSea     | 0.792     | 0.768 | 0.770 | -0.024 | -0.022 | 0.002  | 2.7E-09 | 0.001 |
| cg26879421 | NET1          | Neuroepithelial cell transforming 1                                 | 10  | 5455710   | Body             | S_Shore     | 0.720     | 0.699 | 0.698 | -0.021 | -0.022 | 0.000  | 4.5E-06 | 0.040 |
| cg22069247 | NMUR1         | Neuromedin U receptor 1                                             | 2   | 232393256 | Body             | N_Shore     | 0.665     | 0.627 | 0.638 | -0.039 | -0.027 | 0.011  | 2.1E-08 | 0.002 |
| cg05262369 | NUCKS1        | Nuclear casein kinase and cyclin dependent kinase substrate 1       | 1   | 205716365 | Body             | N_Shore     | 0.738     | 0.709 | 0.713 | -0.030 | -0.025 | 0.005  | 7.0E-08 | 0.003 |
| cg14499189 | PDE4D         | Phosphodiesterase 4D                                                | 5   | 59492401  | 5'UTR            | OpenSea     | 0.806     | 0.787 | 0.783 | -0.019 | -0.023 | -0.003 | 2.4E-06 | 0.031 |
| cg23987137 | PDE4D         | Phosphodiesterase 4D                                                | 5   | 58653624  | Body             | OpenSea     | 0.800     | 0.777 | 0.778 | -0.023 | -0.022 | 0.001  | 1.1E-06 | 0.021 |
| cg17075888 | PDK4          | Pyruvat dehydrogenase kinase 4                                      | 7   | 95225339  | Body             | N_Shore     | 0.595     | 0.594 | 0.568 | -0.001 | -0.027 | -0.026 | 1.8E-06 | 0.028 |
| cg07599432 | PDZD8         | PDZ domain containing 8                                             | 10  | 119126318 | Body             | OpenSea     | 0.770     | 0.740 | 0.740 | -0.029 | -0.029 | 0.000  | 8.2E-07 | 0.019 |
| cg12368246 | PLAGL1        | PLAG1 like zinc finger 1                                            | 6   | 144286757 | 5'UTR            | OpenSea     | 0.824     | 0.802 | 0.805 | -0.022 | -0.019 | 0.003  | 2.1E-06 | 0.029 |
| cg16615151 | PLCXD2        | Phosphatidylinositol specific phospholipase C X domain containing 2 | 3   | 111409324 | Body             | OpenSea     | 0.545     | 0.510 | 0.514 | -0.035 | -0.030 | 0.004  | 1.0E-07 | 0.004 |
| cg26683198 | PPAP2B        | Phospholipid phosphatase 3                                          | 1   | 57039392  | Body             | OpenSea     | 0.519     | 0.493 | 0.498 | -0.026 | -0.021 | 0.005  | 3.5E-06 | 0.035 |
| cg15438481 | PRKCA         | Protein kinase C alpha                                              | 17  | 64499496  | Body             | OpenSea     | 0.877     | 0.867 | 0.859 | -0.009 | -0.017 | -0.008 | 3.2E-06 | 0.034 |
| cg02641339 | PSTPIP2       | Proline-serine-threonine phosphatase interacting protein 2          | 18  | 43635048  | Body             | OpenSea     | 0.609     | 0.589 | 0.570 | -0.020 | -0.039 | -0.019 | 1.7E-06 | 0.028 |
| cg03189652 | PTH2R         | Parathyroid hormone 2 receptor                                      | 2   | 209224422 | TSS200           | N_Shore     | 0.763     | 0.740 | 0.735 | -0.022 | -0.028 | -0.006 | 5.3E-06 | 0.042 |
| cg08047233 | RERE          | Arginine-glutamic acid dipeptide repeats                            | 1   | 8578167   | Body             | OpenSea     | 0.696     | 0.671 | 0.666 | -0.026 | -0.031 | -0.005 | 4.9E-06 | 0.041 |
| cg07268595 | RNF166        | Ring finger protein 166                                             | 16  | 88766501  | Body;<br>5'UTR   | S_Shore     | 0.584     | 0.561 | 0.555 | -0.023 | -0.029 | -0.006 | 5.8E-06 | 0.044 |
| cg04161193 | RNF19A        | Ring finger protein 19A                                             | 8   | 101338327 | 5'UTR            | OpenSea     | 0.551     | 0.525 | 0.526 | -0.026 | -0.025 | 0.001  | 3.4E-06 | 0.035 |
| cg21882620 | SLC22A23      | Solute carrier family 22 member 23                                  | 6   | 3379971   | Body             | OpenSea     | 0.752     | 0.736 | 0.718 | -0.017 | -0.035 | -0.018 | 8.5E-07 | 0.019 |

Table S2 (continued)

| cgID       | Gene    | Full gene name                                      | Chr | Position  | Gene context   | CpG context | Mean beta |       |       | Δ beta |        |        | P-value | FDR   |
|------------|---------|-----------------------------------------------------|-----|-----------|----------------|-------------|-----------|-------|-------|--------|--------|--------|---------|-------|
|            |         |                                                     |     |           |                |             | B         | 4W    | 12W   | 4W-B   | 12W-B  | 12W-4W |         |       |
| cg03492107 | SNTB1   | Syntrophin beta 1                                   | 8   | 121715913 | Body           | OpenSea     | 0.644     | 0.612 | 0.613 | -0.032 | -0.031 | 0.001  | 2.5E-07 | 0.009 |
| cg15835363 | STARD9  | StAR related lipid transfer domain containing 9     | 15  | 42894942  | Body           | OpenSea     | 0.759     | 0.727 | 0.731 | -0.032 | -0.028 | 0.004  | 1.9E-08 | 0.002 |
| cg14957855 | SWT1    | SWT1. RNA endoribonuclease homolog                  | 1   | 185234541 | Body           | OpenSea     | 0.857     | 0.833 | 0.865 | -0.025 | 0.007  | 0.032  | 2.6E-06 | 0.032 |
| cg02949436 | TCF25   | Transcription factor 25                             | 16  | 89940853  | Body           | S_Shore     | 0.068     | 0.058 | 0.059 | -0.010 | -0.009 | 0.000  | 2.9E-06 | 0.033 |
| cg19933954 | TCFL5   | Transcription factor like 5                         | 20  | 61494242  | TSS1500        | S_Shore     | 0.630     | 0.588 | 0.591 | -0.042 | -0.039 | 0.003  | 3.4E-06 | 0.035 |
| cg22744398 | TEC     | Tec protein tyrosine kinase                         | 4   | 48226070  | Body           | OpenSea     | 0.650     | 0.622 | 0.612 | -0.027 | -0.038 | -0.010 | 5.9E-07 | 0.016 |
| cg27549551 | TM4SF20 | Transmembrane 4 L six family member 20              | 2   | 228245419 | TSS1500        | OpenSea     | 0.783     | 0.765 | 0.752 | -0.018 | -0.031 | -0.012 | 3.2E-07 | 0.010 |
| cg10288625 | TMEM45A | Transmembrane protein 45A                           | 3   | 100289748 | Body           | OpenSea     | 0.824     | 0.805 | 0.823 | -0.019 | -0.001 | 0.018  | 1.9E-06 | 0.028 |
| cg25124205 | TPD52L1 | Tumor protein D52 like 1                            | 6   | 125519976 | 5'UTR;<br>Body | OpenSea     | 0.730     | 0.698 | 0.676 | -0.032 | -0.053 | -0.022 | 9.2E-09 | 0.002 |
| cg23999170 | TSPAN2  | Tetraspanin 2                                       | 1   | 115628111 | Body           | N_Shelf     | 0.715     | 0.688 | 0.687 | -0.027 | -0.028 | -0.002 | 1.5E-06 | 0.026 |
| cg11166303 | TSSC1   | EARP complex and GARP complex interacting protein 1 | 2   | 3320529   | Body           | N_Shore     | 0.650     | 0.624 | 0.620 | -0.026 | -0.030 | -0.004 | 2.3E-06 | 0.031 |
| cg06096446 | TULP4   | Tubby like protein 4                                | 6   | 158744008 | Body           | OpenSea     | 0.700     | 0.686 | 0.680 | -0.014 | -0.020 | -0.005 | 5.2E-06 | 0.042 |
| cg20347155 | ZEB2    | Zinc finger E-box binding homeobox 2                | 2   | 145218951 | Body           | OpenSea     | 0.634     | 0.597 | 0.604 | -0.037 | -0.030 | 0.007  | 3.4E-06 | 0.035 |
| cg00095930 | NA      | NA                                                  | 12  | 109569116 | NA             | OpenSea     | 0.455     | 0.431 | 0.425 | -0.024 | -0.030 | -0.006 | 6.5E-08 | 0.003 |
| cg01119319 | NA      | NA                                                  | 7   | 38356808  | NA             | OpenSea     | 0.596     | 0.552 | 0.558 | -0.044 | -0.038 | 0.006  | 1.2E-07 | 0.004 |
| cg02146228 | NA      | NA                                                  | 14  | 75401904  | NA             | OpenSea     | 0.528     | 0.511 | 0.503 | -0.017 | -0.025 | -0.009 | 5.8E-08 | 0.003 |
| cg05303899 | NA      | NA                                                  | 2   | 9919494   | NA             | OpenSea     | 0.692     | 0.674 | 0.673 | -0.018 | -0.019 | -0.001 | 5.0E-06 | 0.041 |
| cg05329280 | NA      | NA                                                  | 20  | 5192635   | NA             | OpenSea     | 0.726     | 0.699 | 0.697 | -0.028 | -0.030 | -0.002 | 6.9E-07 | 0.017 |
| cg05999592 | NA      | NA                                                  | 11  | 72925008  | NA             | N_Shelf     | 0.630     | 0.608 | 0.608 | -0.022 | -0.022 | 0.000  | 4.5E-06 | 0.040 |
| cg07418291 | NA      | NA                                                  | 15  | 58553346  | NA             | OpenSea     | 0.757     | 0.733 | 0.738 | -0.024 | -0.019 | 0.005  | 2.5E-06 | 0.032 |
| cg08698943 | NA      | NA                                                  | 10  | 3509758   | NA             | OpenSea     | 0.412     | 0.390 | 0.391 | -0.023 | -0.021 | 0.001  | 1.6E-06 | 0.027 |
| cg10042645 | NA      | NA                                                  | 11  | 2308589   | NA             | OpenSea     | 0.651     | 0.622 | 0.625 | -0.029 | -0.027 | 0.003  | 2.8E-06 | 0.032 |
| cg10629173 | NA      | NA                                                  | 10  | 5576434   | NA             | OpenSea     | 0.772     | 0.745 | 0.745 | -0.027 | -0.026 | 0.000  | 3.4E-06 | 0.035 |
| cg12582317 | NA      | NA                                                  | 17  | 55822272  | NA             | OpenSea     | 0.770     | 0.748 | 0.748 | -0.022 | -0.022 | 0.000  | 4.3E-06 | 0.040 |
| cg14165660 | NA      | NA                                                  | 10  | 112889349 | NA             | OpenSea     | 0.811     | 0.789 | 0.792 | -0.023 | -0.019 | 0.004  | 7.3E-08 | 0.003 |
| cg15256315 | NA      | NA                                                  | 8   | 135791732 | NA             | OpenSea     | 0.317     | 0.283 | 0.294 | -0.035 | -0.024 | 0.011  | 5.4E-06 | 0.042 |
| cg15295322 | NA      | NA                                                  | 3   | 178689645 | NA             | OpenSea     | 0.769     | 0.752 | 0.748 | -0.016 | -0.021 | -0.004 | 4.6E-06 | 0.040 |
| cg16797699 | NA      | NA                                                  | 12  | 109569084 | NA             | OpenSea     | 0.708     | 0.682 | 0.682 | -0.026 | -0.026 | 0.000  | 3.2E-07 | 0.010 |
| cg19815228 | NA      | NA                                                  | 10  | 134232489 | NA             | OpenSea     | 0.615     | 0.581 | 0.575 | -0.034 | -0.040 | -0.006 | 4.1E-06 | 0.038 |
| cg20025086 | NA      | NA                                                  | 12  | 109569130 | NA             | OpenSea     | 0.502     | 0.481 | 0.476 | -0.021 | -0.025 | -0.005 | 7.5E-07 | 0.018 |
| cg21156054 | NA      | NA                                                  | 21  | 40225493  | NA             | OpenSea     | 0.464     | 0.453 | 0.439 | -0.011 | -0.025 | -0.014 | 3.1E-06 | 0.034 |
| cg22768761 | NA      | NA                                                  | 15  | 58551412  | NA             | OpenSea     | 0.877     | 0.858 | 0.863 | -0.019 | -0.014 | 0.005  | 1.7E-06 | 0.028 |
| cg26129664 | NA      | NA                                                  | 10  | 134232399 | NA             | OpenSea     | 0.464     | 0.429 | 0.426 | -0.034 | -0.038 | -0.003 | 2.6E-08 | 0.002 |
| cg26645302 | NA      | NA                                                  | 14  | 22891244  | NA             | OpenSea     | 0.254     | 0.231 | 0.217 | -0.023 | -0.037 | -0.014 | 3.8E-06 | 0.037 |
| cg26835531 | NA      | NA                                                  | 18  | 47980832  | NA             | OpenSea     | 0.822     | 0.811 | 0.798 | -0.011 | -0.024 | -0.013 | 2.6E-06 | 0.032 |

Abbreviations: 4W, 4 weeks of dietary treatment; 12W, 12 weeks of dietary treatment; B, Baseline; Chr, Chromosome; FDR, False discovery rate; NA, No information available. FDR <0.05. The beta value is defined as the ratio of methylated versus unmethylated allele ( $\beta = M/(M + U + 100)$ ). The beta values are between 0 and 1 and can be interpreted as 0 being unmethylated and 1 being methylated.

**Table S3** Differentially methylated CpGs (sorted alphabetically by gene name and ascending by cgID for CpGs with no gene annotation) from baseline to 4 weeks of dietary treatment (n=56)

| cgID       | Gene    | Full gene name                                                      | Chr | Position  | Gene context | CpG context | Mean beta |       |       | Δ beta |         | FDR   |
|------------|---------|---------------------------------------------------------------------|-----|-----------|--------------|-------------|-----------|-------|-------|--------|---------|-------|
|            |         |                                                                     |     |           |              |             | B         | 4W    | 12W   | 4W-B   | P-value |       |
| cg17951488 | AGAP7   | NA                                                                  | 10  | 230193513 | TSS1500      | N_Shore     | 0.891     | 0.872 | 0.879 | -0.019 | 1.8E-06 | 0.044 |
| cg10077346 | BCKDHB  | Branched chain keto acid dehydrogenase E1 subunit beta              | 6   | 2308589   | Body         | OpenSea     | 0.748     | 0.716 | 0.728 | -0.032 | 5.8E-07 | 0.022 |
| cg04871807 | C5orf27 | NA                                                                  | 5   | 23064608  | TSS1500      | OpenSea     | 0.536     | 0.508 | 0.506 | -0.028 | 1.4E-06 | 0.036 |
| cg14928764 | CD93    | CD93 molecule                                                       | 20  | 112889349 | Body         | OpenSea     | 0.821     | 0.799 | 0.796 | -0.023 | 1.4E-06 | 0.036 |
| cg20601482 | CERS6   | Ceramide synthase 6                                                 | 2   | 58553346  | Body         | OpenSea     | 0.737     | 0.711 | 0.714 | -0.026 | 6.6E-07 | 0.023 |
| cg12359298 | DTD1    | D-tyrosyl-tRNA deacylase 1                                          | 20  | 95186505  | 3'UTR        | OpenSea     | 0.683     | 0.656 | 0.653 | -0.026 | 1.5E-06 | 0.036 |
| cg23752007 | ELMO1   | Engulfment and cell motility 1                                      | 7   | 2769184   | 5'UTR        | OpenSea     | 0.742     | 0.717 | 0.720 | -0.025 | 2.2E-06 | 0.050 |
| cg02314596 | FOXN3   | Forkhead box N3                                                     | 14  | 18735103  | Body         | OpenSea     | 0.744     | 0.720 | 0.727 | -0.024 | 7.6E-08 | 0.007 |
| cg03702011 | GALNT2  | Polypeptide N-acetylgalactosaminyltransferase 2                     | 1   | 135791732 | TSS200       | OpenSea     | 0.732     | 0.701 | 0.708 | -0.031 | 2.6E-07 | 0.014 |
| cg27246571 | HAL     | Histidine ammonia-lyase                                             | 12  | 109569116 | Body         | Island      | 0.720     | 0.693 | 0.694 | -0.028 | 5.0E-07 | 0.021 |
| cg17439422 | HEPN1   | Hepatocellular carcinoma down-regulated 1                           | 11  | 38356808  | TSS1500      | N_Shelf     | 0.836     | 0.820 | 0.818 | -0.017 | 1.1E-07 | 0.007 |
| cg06865026 | IMPA2   | Inositol monophosphatase 2                                          | 18  | 73868507  | Body         | OpenSea     | 0.850     | 0.820 | 0.831 | -0.029 | 1.9E-09 | 0.001 |
| cg11555067 | INPP4A  | Inositol polyphosphate-4-phosphatase type I A                       | 2   | 205716365 | 5'UTR        | OpenSea     | 0.291     | 0.262 | 0.275 | -0.029 | 3.3E-07 | 0.017 |
| cg10967866 | INPP5A  | Inositol polyphosphate-5-phosphatase A                              | 10  | 134232399 | Body         | S_Shore     | 0.744     | 0.712 | 0.716 | -0.032 | 1.0E-07 | 0.007 |
| cg19137806 | INPP5A  | Inositol polyphosphate-5-phosphatase A                              | 10  | 96389588  | Body         | S_Shore     | 0.709     | 0.677 | 0.678 | -0.031 | 9.8E-08 | 0.007 |
| cg05993525 | KCNQ1   | Potassium voltage-gated channel subfamily Q member 1                | 11  | 134362164 | Body         | OpenSea     | 0.567     | 0.534 | 0.539 | -0.033 | 9.0E-07 | 0.026 |
| cg08376310 | KCNQ1   | Potassium voltage-gated channel subfamily Q member 1                | 11  | 99081350  | Body         | OpenSea     | 0.902     | 0.887 | 0.886 | -0.016 | 4.8E-08 | 0.006 |
| cg13617154 | NAT8    | N-acetyltransferase 8                                               | 2   | 12015910  | Body         | OpenSea     | 0.792     | 0.768 | 0.770 | -0.024 | 1.3E-08 | 0.003 |
| cg22069247 | NMUR1   | Neuromedin U receptor 1                                             | 2   | 121715913 | Body         | N_Shore     | 0.665     | 0.627 | 0.638 | -0.039 | 9.9E-09 | 0.003 |
| cg05262369 | NUCKS1  | Nuclear casein kinase and cyclin dependent kinase substrate 1       | 1   | 89852725  | Body         | N_Shore     | 0.738     | 0.709 | 0.713 | -0.030 | 9.7E-08 | 0.007 |
| cg16615151 | PLCXD2  | Phosphatidylinositol specific phospholipase C X domain containing 2 | 3   | 2858621   | Body         | OpenSea     | 0.545     | 0.510 | 0.514 | -0.035 | 1.1E-07 | 0.007 |
| cg03492107 | SNTB1   | Syntrophin beta 1                                                   | 8   | 80920458  | Body         | OpenSea     | 0.644     | 0.612 | 0.613 | -0.032 | 6.4E-07 | 0.023 |
| cg15835363 | STARD9  | StAR related lipid transfer domain containing 9                     | 15  | 55822272  | Body         | OpenSea     | 0.759     | 0.727 | 0.731 | -0.032 | 2.8E-08 | 0.005 |
| cg00095930 | NA      | NA                                                                  | 12  | 134362170 | NA           | OpenSea     | 0.455     | 0.431 | 0.425 | -0.024 | 7.8E-07 | 0.025 |
| cg01119319 | NA      | NA                                                                  | 7   | 42894942  | NA           | OpenSea     | 0.596     | 0.552 | 0.558 | -0.044 | 7.9E-08 | 0.007 |
| cg07418291 | NA      | NA                                                                  | 15  | 232393256 | NA           | OpenSea     | 0.757     | 0.733 | 0.738 | -0.024 | 7.2E-07 | 0.024 |
| cg10042645 | NA      | NA                                                                  | 11  | 51487759  | NA           | OpenSea     | 0.651     | 0.622 | 0.625 | -0.029 | 8.3E-07 | 0.025 |
| cg12582317 | NA      | NA                                                                  | 17  | 37429500  | NA           | OpenSea     | 0.770     | 0.748 | 0.748 | -0.022 | 1.5E-06 | 0.036 |
| cg14165660 | NA      | NA                                                                  | 10  | 109569084 | NA           | OpenSea     | 0.811     | 0.789 | 0.792 | -0.023 | 4.8E-08 | 0.006 |
| cg15256315 | NA      | NA                                                                  | 8   | 111409324 | NA           | OpenSea     | 0.317     | 0.283 | 0.294 | -0.035 | 1.3E-06 | 0.035 |
| cg16797699 | NA      | NA                                                                  | 12  | 169337576 | NA           | OpenSea     | 0.708     | 0.682 | 0.682 | -0.026 | 5.4E-07 | 0.022 |
| cg22768761 | NA      | NA                                                                  | 15  | 58551412  | NA           | OpenSea     | 0.877     | 0.858 | 0.863 | -0.019 | 4.0E-07 | 0.018 |
| cg26129664 | NA      | NA                                                                  | 10  | 124788656 | NA           | OpenSea     | 0.464     | 0.429 | 0.426 | -0.034 | 4.1E-07 | 0.018 |

Abbreviations: 4W, 4 weeks of dietary treatment; 12W, 12 weeks of dietary treatment; B, Baseline; Chr, Chromosome; FDR, False discovery rate; NA, No information available. FDR <0.05. The beta value is defined as the ratio of methylated versus unmethylated allele ( $\beta = M/(M + U + 100)$ ). The beta values are between 0 and 1 and can be interpreted as 0 being unmethylated and 1 being methylated.

**Table S4** Differentially methylated CpGs (sorted alphabetically by gene name and ascending by cgID for CpGs with no gene annotation) from baseline to 12 weeks of dietary treatment (n= 49)

| cgID       | Gene           | Full gene name                                              | Chr | Position  | Gene context | CpG context | Mean beta |       |       | Δ beta |         |       |
|------------|----------------|-------------------------------------------------------------|-----|-----------|--------------|-------------|-----------|-------|-------|--------|---------|-------|
|            |                |                                                             |     |           |              |             | B         | 4W    | 12W   | 12W-B  | P-value | FDR   |
| cg04871807 | C5orf27        | NA                                                          | 5   | 95186505  | TSS1500      | OpenSea     | 0.536     | 0.508 | 0.506 | -0.030 | 9.9E-08 | 0.013 |
| cg14928764 | CD93           | CD93 molecule                                               | 20  | 23064608  | Body         | OpenSea     | 0.821     | 0.799 | 0.796 | -0.026 | 5.9E-07 | 0.023 |
| cg04075184 | CLASP1         | Cytoplasmic linker associated protein 1                     | 2   | 122290763 | Body         | S_Shelf     | 0.744     | 0.732 | 0.718 | -0.025 | 2.2E-07 | 0.015 |
| cg19393755 | CPSF4L         | Cleavage and polyadenylation specific factor 4 like         | 17  | 71258101  | TSS200       | OpenSea     | 0.707     | 0.689 | 0.680 | -0.027 | 1.6E-06 | 0.039 |
| cg22911054 | CPT1A          | Carnitine palmitoyltransferase 1A                           | 11  | 68603379  | 5'UTR        | N_Shelf     | 0.770     | 0.745 | 0.728 | -0.042 | 4.9E-11 | 0.000 |
| cg03457142 | EIF4E3         | Eukaryotic translation initiation factor 4E family member 3 | 3   | 71804859  | TSS1500      | S_Shore     | 0.498     | 0.484 | 0.478 | -0.019 | 5.1E-07 | 0.021 |
| cg24170465 | FAM198B        | Family with sequence similarity 198 member B                | 4   | 159094277 | TSS200       | OpenSea     | 0.682     | 0.670 | 0.649 | -0.033 | 1.4E-06 | 0.038 |
| cg02479755 | FTO            | Fat mass and obesity-associated protein                     | 16  | 54097517  | Body         | OpenSea     | 0.830     | 0.808 | 0.804 | -0.026 | 4.1E-07 | 0.020 |
| cg17439422 | HEPN1          | Hepatocellular carcinoma down-regulated 1                   | 11  | 124788656 | TSS1500      | N_Shelf     | 0.836     | 0.820 | 0.818 | -0.019 | 7.1E-07 | 0.026 |
| cg08376310 | KCNQ1          | Potassium voltage-gated channel subfamily Q member 1        | 11  | 2858621   | Body         | OpenSea     | 0.902     | 0.887 | 0.886 | -0.016 | 1.3E-07 | 0.014 |
| cg04460609 | LDB2           | LIM domain binding 2                                        | 4   | 16532808  | Body         | OpenSea     | 0.514     | 0.490 | 0.481 | -0.033 | 1.3E-08 | 0.003 |
| cg24133663 | LEPREL1        | Prolyl 3-hydroxylase 2                                      | 3   | 189679585 | Body         | OpenSea     | 0.088     | 0.088 | 0.075 | -0.013 | 7.8E-07 | 0.027 |
| cg01164919 | LOC101927588   | NA                                                          | 8   | 125214930 | Body         | OpenSea     | 0.855     | 0.847 | 0.833 | -0.022 | 4.2E-07 | 0.020 |
| cg09427959 | MED13L         | Mediator complex subunit 13 like                            | 12  | 116520303 | Body         | OpenSea     | 0.813     | 0.800 | 0.791 | -0.023 | 9.3E-07 | 0.029 |
| cg14728609 | MIR3134; SUSD1 | NA; Sushi domain containing 1                               | 9   | 114933506 | Body         | N_Shelf     | 0.679     | 0.659 | 0.656 | -0.023 | 1.0E-06 | 0.031 |
| cg13617154 | NAT8           | N-acetyltransferase 8                                       | 2   | 73868507  | Body         | OpenSea     | 0.792     | 0.768 | 0.770 | -0.022 | 1.7E-07 | 0.015 |
| cg17075888 | PDK4           | Pyruvate dehydrogenase kinase 4                             | 7   | 95225339  | Body         | N_Shore     | 0.595     | 0.594 | 0.568 | -0.027 | 1.6E-06 | 0.039 |
| cg15438481 | PRKCA          | Protein kinase C alpha                                      | 17  | 64499496  | Body         | OpenSea     | 0.877     | 0.867 | 0.859 | -0.017 | 1.3E-06 | 0.034 |
| cg02641339 | PSTPIP2        | Proline-serine-threonine phosphatase interacting protein 2  | 18  | 43635048  | Body         | OpenSea     | 0.609     | 0.589 | 0.570 | -0.039 | 3.2E-07 | 0.020 |
| cg21882620 | SLC22A23       | Solute carrier family 22 member 23                          | 6   | 3379971   | Body         | OpenSea     | 0.752     | 0.736 | 0.718 | -0.035 | 1.6E-07 | 0.015 |
| cg22744398 | TEC            | Tec protein tyrosine kinase                                 | 4   | 48226070  | Body         | OpenSea     | 0.650     | 0.622 | 0.612 | -0.038 | 3.5E-07 | 0.020 |
| cg27549551 | TM4SF20        | Transmembrane 4 L six family member 20                      | 2   | 228245419 | TSS1500      | OpenSea     | 0.783     | 0.765 | 0.752 | -0.031 | 9.1E-08 | 0.013 |
| cg25124205 | TPD52L1        | Tumor protein D52 like 1                                    | 6   | 125519976 | 5'UTR. Body  | OpenSea     | 0.730     | 0.698 | 0.676 | -0.053 | 3.4E-09 | 0.001 |
| cg06096446 | TULP4          | Tubby like protein 4                                        | 6   | 158744008 | Body         | OpenSea     | 0.700     | 0.686 | 0.680 | -0.020 | 8.7E-07 | 0.029 |
| cg00095930 | NA             | NA                                                          | 12  | 109569116 | NA           | OpenSea     | 0.455     | 0.431 | 0.425 | -0.030 | 1.8E-08 | 0.020 |
| cg02146228 | NA             | NA                                                          | 14  | 75401904  | NA           | OpenSea     | 0.528     | 0.511 | 0.503 | -0.025 | 1.2E-06 | 0.003 |
| cg14783355 | NA             | NA                                                          | 5   | 10530621  | NA           | OpenSea     | 0.721     | 0.706 | 0.692 | -0.029 | 5.2E-07 | 0.033 |
| cg21156054 | NA             | NA                                                          | 21  | 40225493  | NA           | OpenSea     | 0.464     | 0.453 | 0.439 | -0.025 | 1.9E-07 | 0.021 |
| cg26129664 | NA             | NA                                                          | 10  | 134232399 | NA           | OpenSea     | 0.464     | 0.429 | 0.426 | -0.038 | 1.1E-06 | 0.015 |
| cg26645302 | NA             | NA                                                          | 14  | 22891244  | NA           | OpenSea     | 0.254     | 0.231 | 0.217 | -0.037 | 4.3E-07 | 0.033 |
| cg26835531 | NA             | NA                                                          | 18  | 47980832  | NA           | OpenSea     | 0.822     | 0.811 | 0.798 | -0.024 | 9.9E-08 | 0.020 |

Abbreviations: 4W, 4 weeks of dietary treatment; 12W, 12 weeks of dietary treatment; B, Baseline; Chr, Chromosome; FDR, False discovery rate; NA, No information available. FDR <0.05. The beta value is defined as the ratio of methylated versus unmethylated allele ( $\beta = M/(M + U + 100)$ ). The beta values are between 0 and 1 and can be interpreted as 0 being unmethylated and 1 being methylated.
